# Supplementary material for: On the lubricity of transition metal dichalcogenides: an ab initio study
Source: Royal Society of Chemistry journal article supplement (doi:10.1039/c7nr00925a), 2017-01-01

# Supplementary Information: On The Lubricity of Transition Metal Dichalcogenides: an *ab initio* Study

Benjamin J. Irving,<sup>1\*</sup> Paolo Nicolini,<sup>1</sup> Tomas Polcar<sup>1,2</sup>

<sup>1</sup>Department of Control Engineering, Faculty of Electrical Engineering,  
Czech Technical University in Prague, Karlovo náměstí 13, 121 35 Prague, Czech Republic

<sup>2</sup>nCATS, FEE, University of Southampton,  
SO17 1BJ Southampton, United Kingdom

\*To whom correspondence should be addressed; E-mail: [irvinben@fel.cvut.cz](mailto:irvinben@fel.cvut.cz)

DATE

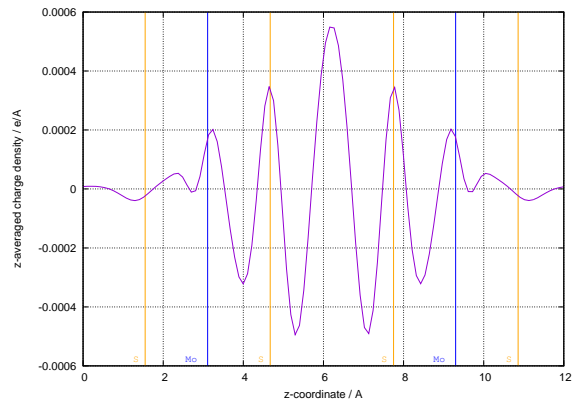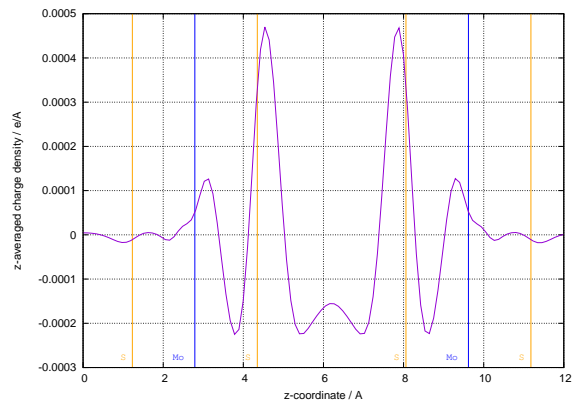

Figure 1: Plane-average charge density for the commensurate MoS<sub>2</sub> bilayer at [L]  $dy = 0.00 \text{ \AA}$  (global energy minimum) and [R]  $dy = 3.68 \text{ \AA}$  (global energy maximum).

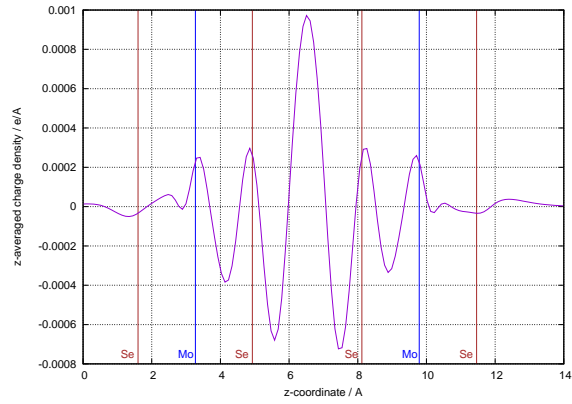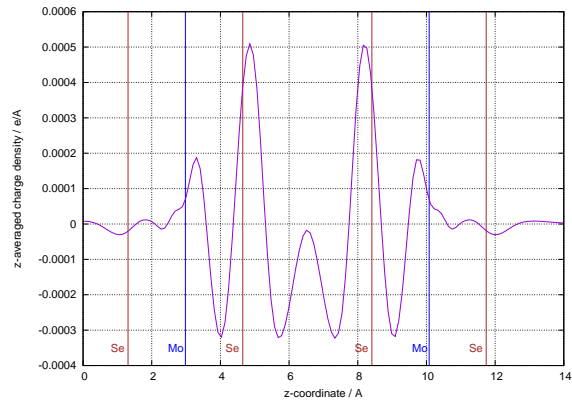

Figure 2: Plane-average charge density for the commensurate MoSe<sub>2</sub> bilayer at [L]  $dy = 0.00 \text{ Å}$  (global energy minimum) and [R]  $dy = 3.84 \text{ Å}$  (global energy maximum).

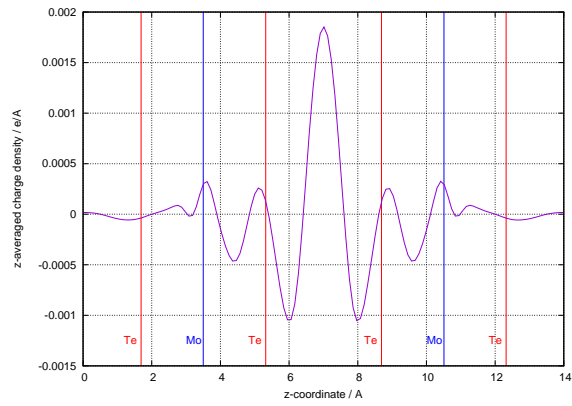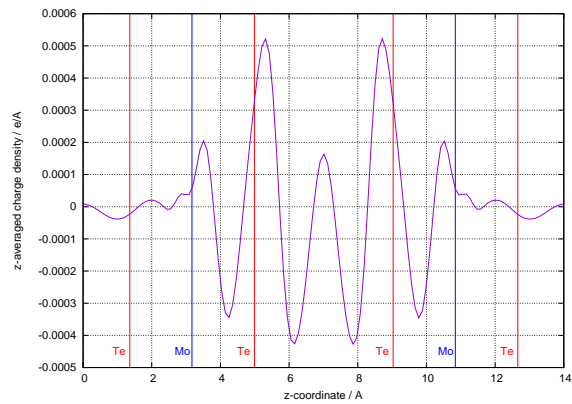

Figure 3: Plane-average charge density for the commensurate  $\text{MoTe}_2$  bilayer at [L]  $dy = 0.00 \text{ Å}$  (global energy minimum) and [R]  $dy = 4.08 \text{ Å}$  (global energy maximum).

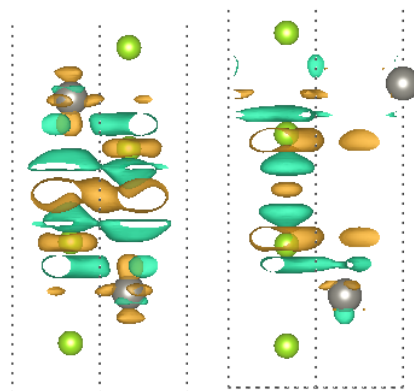

Figure 4: Charge density difference isosurfaces (isolevel  $6.5 \times 10^{-5} \text{ e}/\text{\AA}^3$ , positive = orange; negative = turquoise) for WSe<sub>2</sub> [L] at  $dy = 0.00 \text{ \AA}$  (global energy minimum) and [R]  $dy = 3.84 \text{ \AA}$  (global energy maximum)

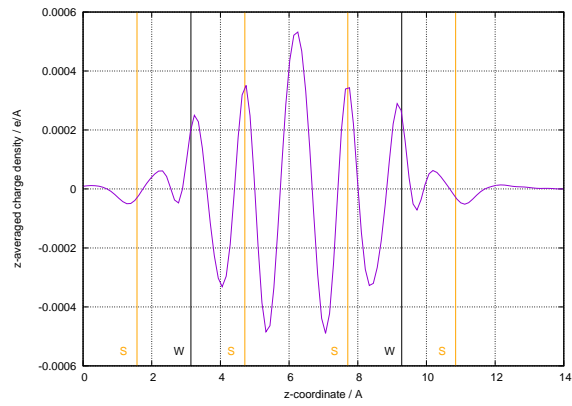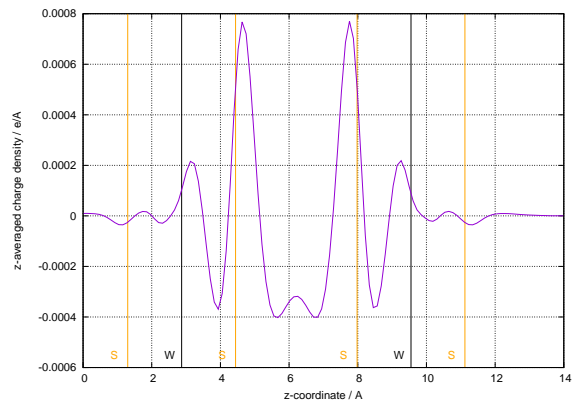

Figure 5: Plane-average charge density for the commensurate  $\text{WS}_2$  bilayer at [L]  $dy = 0.00 \text{ \AA}$  (global energy minimum) and [R]  $dy = 3.68 \text{ \AA}$  (global energy maximum).

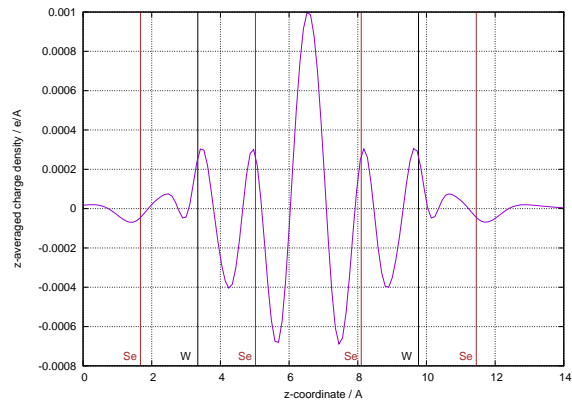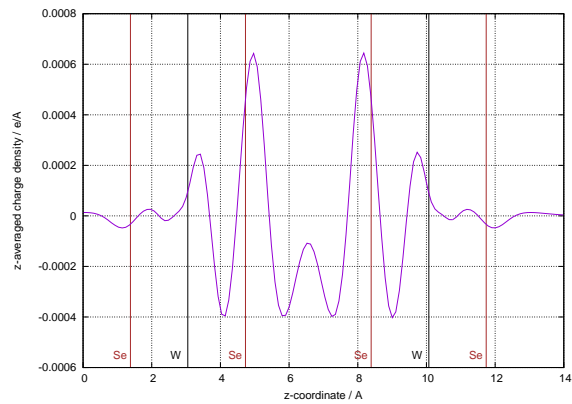

Figure 6: Plane-average charge density for the commensurate  $\text{WSe}_2$  bilayer at [L]  $dy = 0.00 \text{ Å}$  (global energy minimum) and [R]  $dy = 3.84 \text{ Å}$  (global energy maximum).

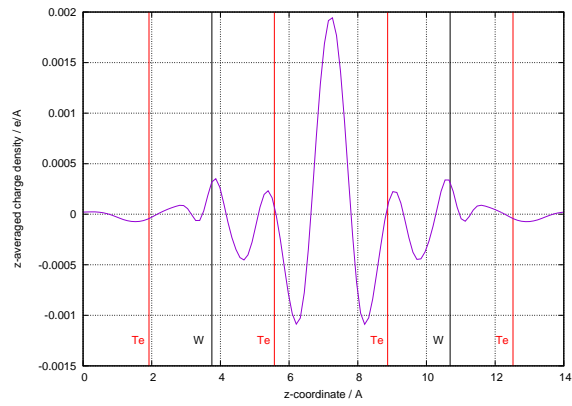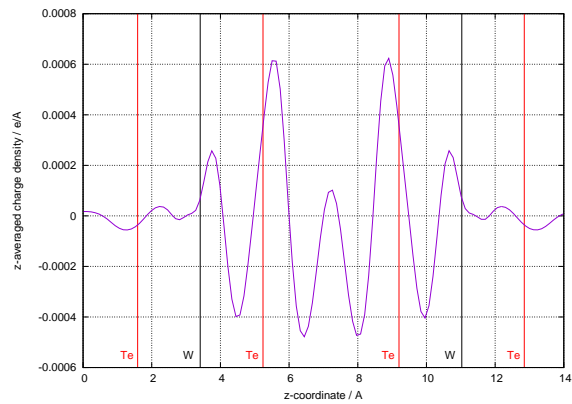

Figure 7: Plane-average charge density for the commensurate  $\text{WTe}_2$  bilayer at [L]  $dy = 0.00 \text{ \AA}$  (global energy minimum) and [R]  $dy = 4.08 \text{ \AA}$  (global energy maximum).



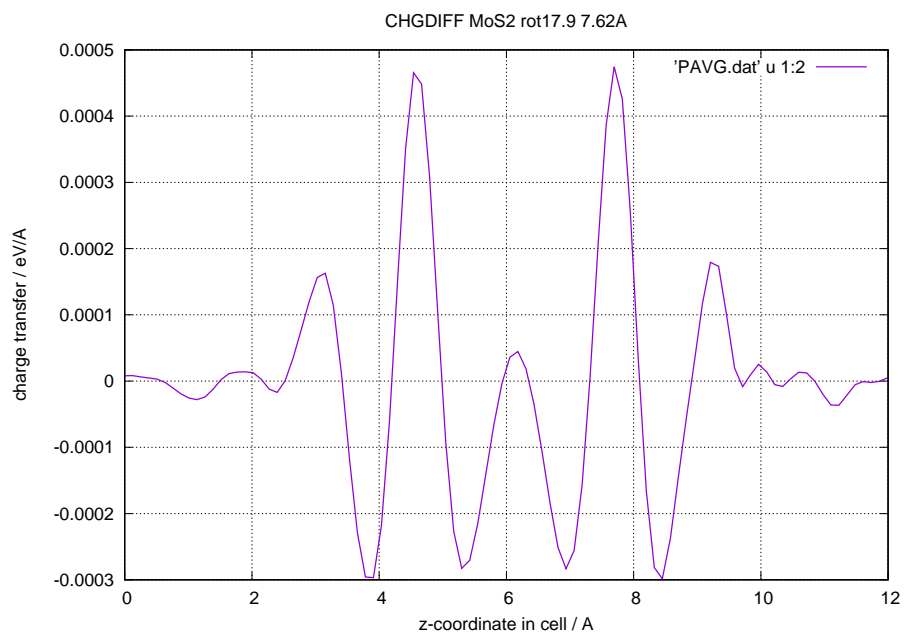

Figure 8: Planar averaged charge density for MoS<sub>2</sub> bilayer, mismatch angle 17.9 degrees, global energy minimum ( $d_y = 7.62 \text{ \AA}$ )

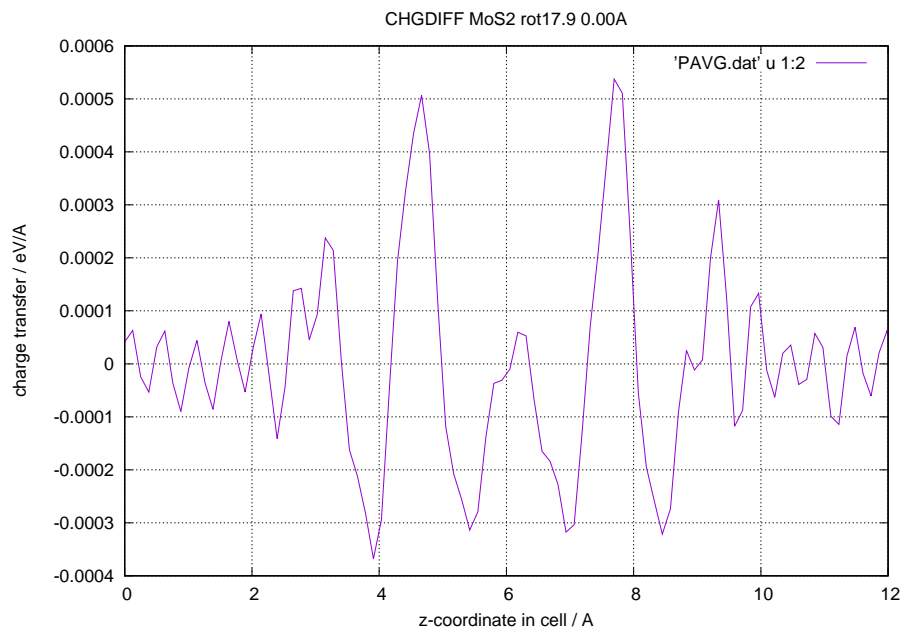

Figure 9: Planar averaged charge density for MoS<sub>2</sub> bilayer, mismatch angle 17.9 degrees, global energy maximum (dy = 0.00 Å)

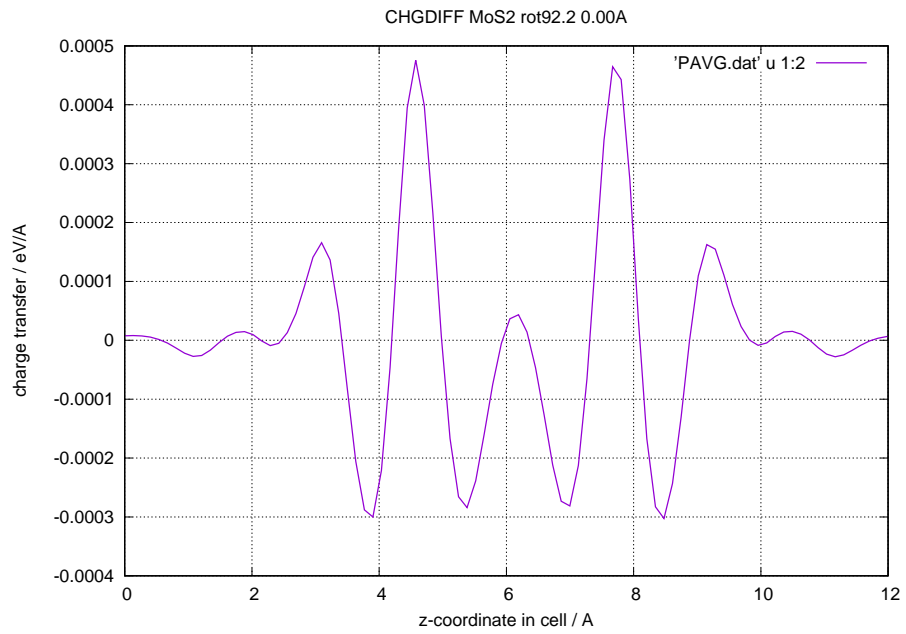

Figure 10: Planar averaged charge density for MoS<sub>2</sub> bilayer, mismatch angle 92.2 degrees, global energy minimum (dy = 0.00 Å)

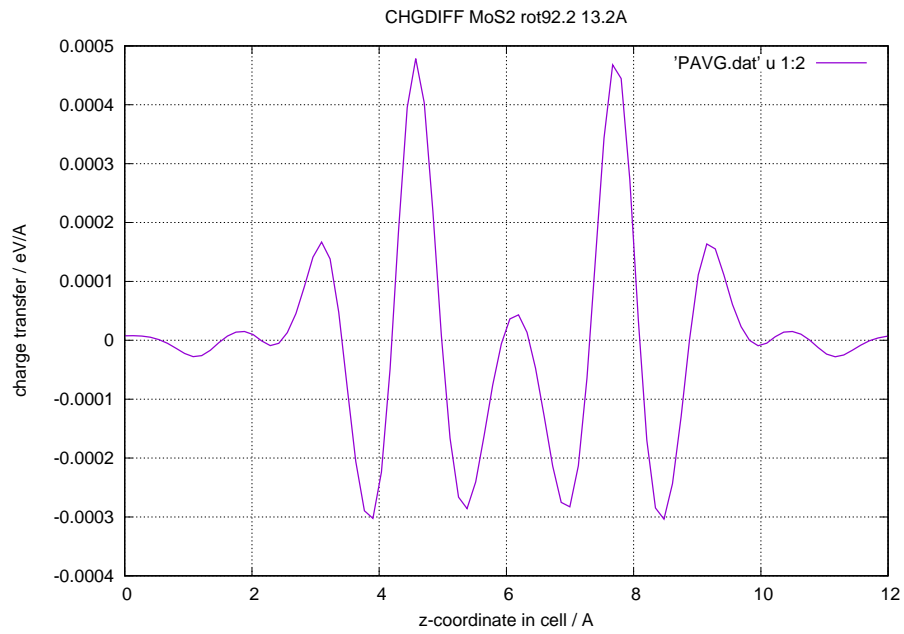

Figure 11: Planar averaged charge density for MoS<sub>2</sub> bilayer, mismatch angle 92.2 degrees, global energy maximum ( $d_y = 13.20 \text{ \AA}$ )

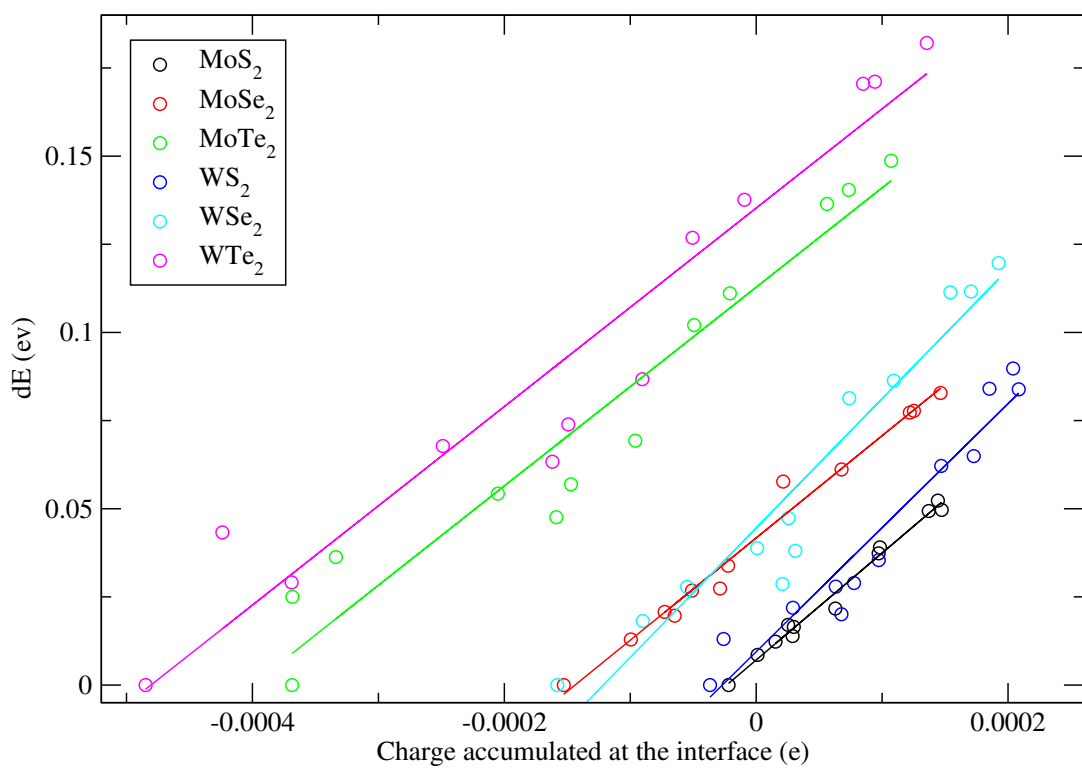

Supplement: c7nr00925a1.pdf [file c7nr00925a1.pdf]
